# Supplementary material for: Psychosocial and pharmacological factors associated with prenatal smoking in women with psychiatric disorders
Source: Research Square preprint supplement (doi:10.21203/rs.3.rs-8234382/v1), 2026-01-12

**Supplementary Information**

**Supplementary Figure1.** Possible factors influencing current smoking statusat the third trimester in individuals without schizophrenia spectrum disorders (non-SSD) **(a)**.Odds ratios (ORs) with 95% confidence intervals (CIs) are shown for each clinical and demographic variable. Bars indicate ORs, with error bars representing 95% CIs. An OR greater than 1.0 indicates a positive association with current smoking, whereas an OR less than 1.0 indicates a negative association. Possible factors influencing the number of cigarettes smoked per day among current smokers, categorized as 0 cigarette, 1-10, 11-20, and over 21 per day at the third trimester in the non-SSD **(b)**.Effect sizes (unstandardized Beta values) are represented, and error bars represent the 95% confidence intervals of the unstandardized Beta values. BPDeq, biperiden equivalent; IMIeq, imipramine equivalent; BMI, body mass index; DZPeq, diazepam equivalent; CPZeq, chlorpromazine equivalent. **p*<0.05, ** *p* <0.01, *** *p* <2.17×10-3.


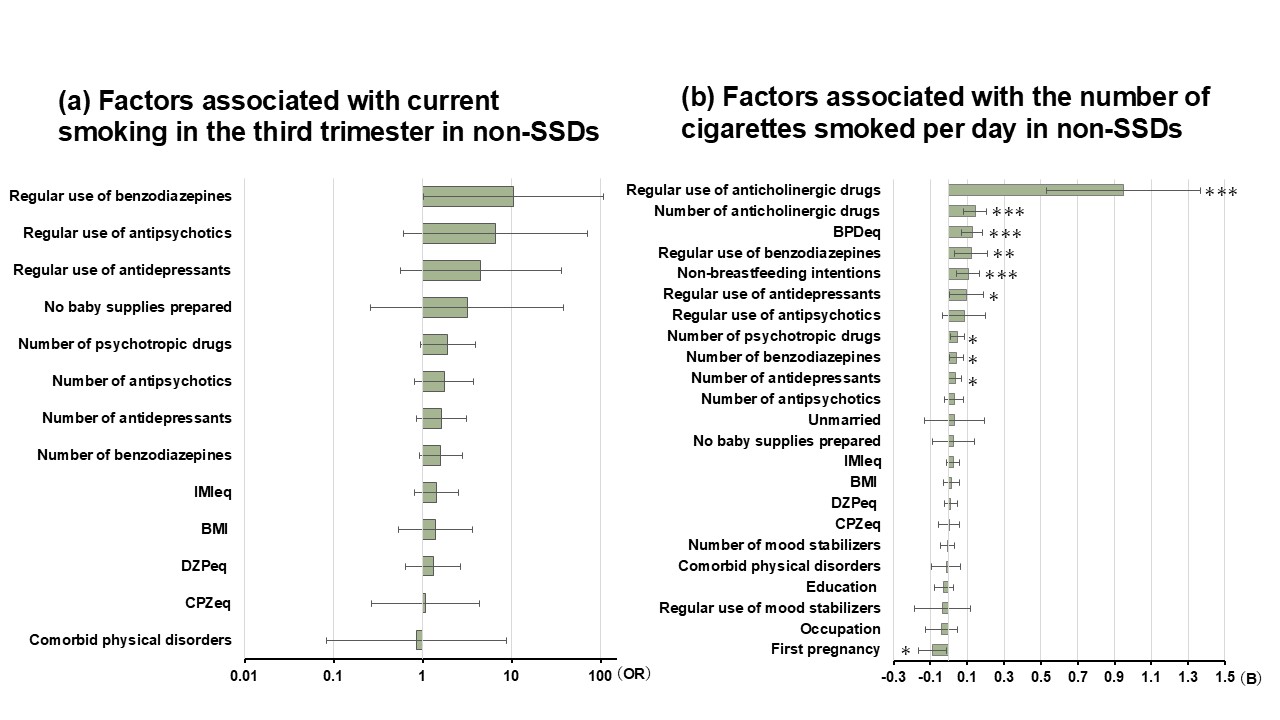

Supplement: Supplementary file 1 [file 3a57707b92131e20fbb61228.docx]
